# Supplementary material for: Conversion of monoculture cropland and open grassland to agroforestry alters the abundance of soil bacteria, fungi and soil-N-cycling genes
Source: PLoS One. 2019 Jun 27;14(6):e0218779. doi: 10.1371/journal.pone.0218779 (PMC6597161; doi:10.1371/journal.pone.0218779)
Supplement: S4 Table — (DOCX) [file pone.0218779.s009.docx]

**S4 Table.** **Spearman’s rank correlation matrix between gene abundances and soil properties across all replicate plots in all three soil types.**

| Soil properties | Gene abundance (gene copies g-1 dry soil) | | | | | | | | | | |
| --- | --- | --- | --- | --- | --- | --- | --- | --- | --- | --- | --- |
| 16S rRNAa | 18S rRNAb | AOAc *amoA* | AOBd *amoA* | *nxrB* | *napA* | *narG* | *nirK* | *nirS* | *nosZ* clade I | *nosZ* clade II |
| WFPSe (%) | -0.33* | 0.05 | 0.79*** | 0.54*** | -0.16 | -0.21 | -0.29* | -0.37** | -0.30* | -0.32* | 0.43** |
| Soil pH (1:4 H2O) | -0.74*** | -0.44** | 0.60*** | 0.39** | -0.74*** | -0.83*** | -0.83*** | -0.77*** | -0.51*** | -0.83*** | 0.37** |
| Soil organic C  (g C m-2) | 0.76*** | 0.39** | -0.58*** | -0.34 | 0.77*** | 0.84*** | 0.84*** | 0.77*** | 0.63*** | 0.85*** | -0.28 |
| Total N (g N m-2) | 0.75*** | 0.28 | -0.61*** | -0.39** | 0.75*** | 0.79*** | 0.80*** | 0.77*** | 0.67*** | 0.82*** | -0.28* |
| Total extractable total N (g N m-2) | 0.32* | 0.29* | -0.12 | 0.00 | 0.42** | 0.57*** | 0.46*** | 0.27 | 0.26 | 0.40** | -0.12 |
| Plant-available P  (g P m-2) | -0.51*** | -0.08 | 0.84*** | 0.49*** | -0.41** | -0.46*** | -0.52*** | -0.62*** | -0.40** | -0.54*** | 0.46*** |
| Exchangeable K  (g K m-2) | -0.57*** | -0.18 | 0.78*** | 0.48** | -0.45** | -0.52*** | -0.55*** | -0.60*** | -0.40** | -0.59*** | 0.47** |
| Exchangeable Mg  (g Mg m-2) | -0.50*** | -0.15 | 0.81*** | 0.48** | -0.42*** | -0.49*** | -0.53*** | -0.59*** | -0.36** | -0.57*** | 0.55*** |
| Exchangeable Mn  (g Mn m-2) | 0.87** | 0.38** | -0.09 | -0.06 | 0.48** | 0.57*** | 0.58*** | 0.38** | 0.35** | 0.51*** | -0.03 |
| Exchangeable Na  (g Na m-2) | -0.39** | -0.21 | 0.54*** | 0.18 | -0.33* | -0.42** | -0.44** | -0.43** | -0.17 | -0.45** | 0.28* |

Soil pH, soil organic C, total N, exchangeable K, Mg, Mn, Na were measured in 2016; water-filled pore space (WFPS), extractable total N and plant-available P were measured in 2017 on the same day that soil samples for DNA extraction were taken. a bacterial 16S rRNA gene, b fungal 18S rRNA gene, c ammonia-oxidizing archaea, d ammonia-oxidizing bacteria, e water-filled pore space, * p ≤ 0.05, ** p ≤ 0.01, *** p < 0.001.
